# Supplementary material
Source: Springer Nature journal article supplement (https://www.springermedizin.de/resource/supplementary/12865_2006_116_MOESM7_ESM.pdf/9428586)

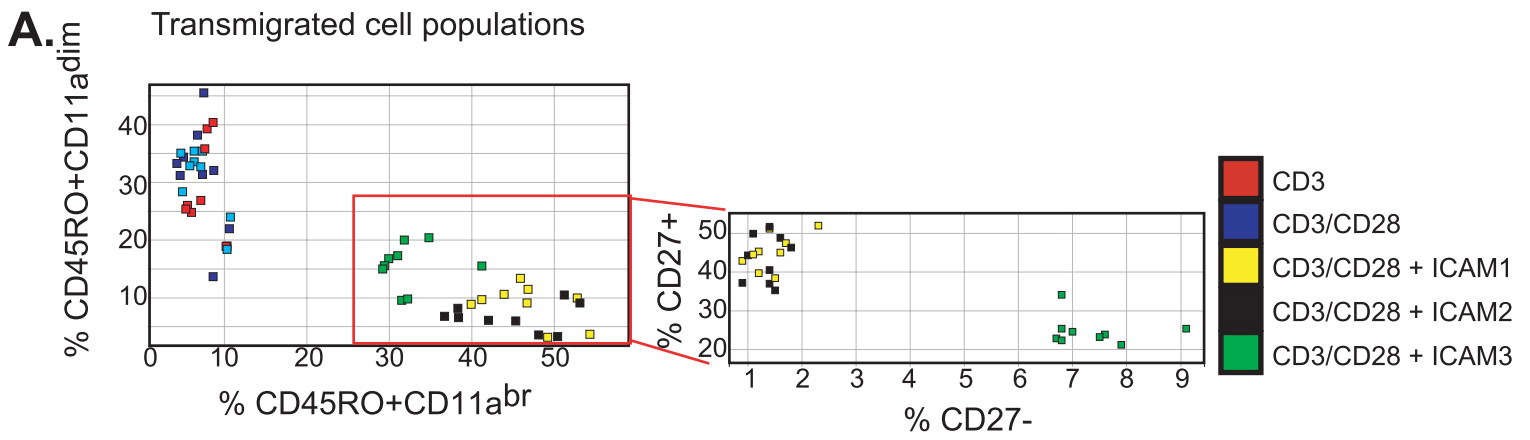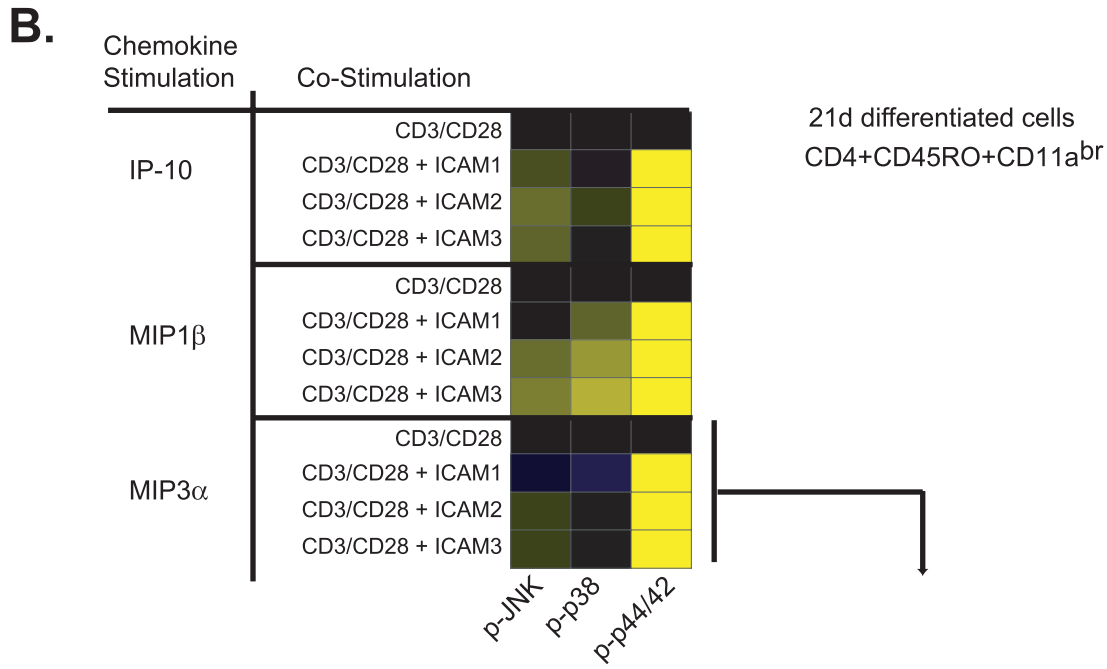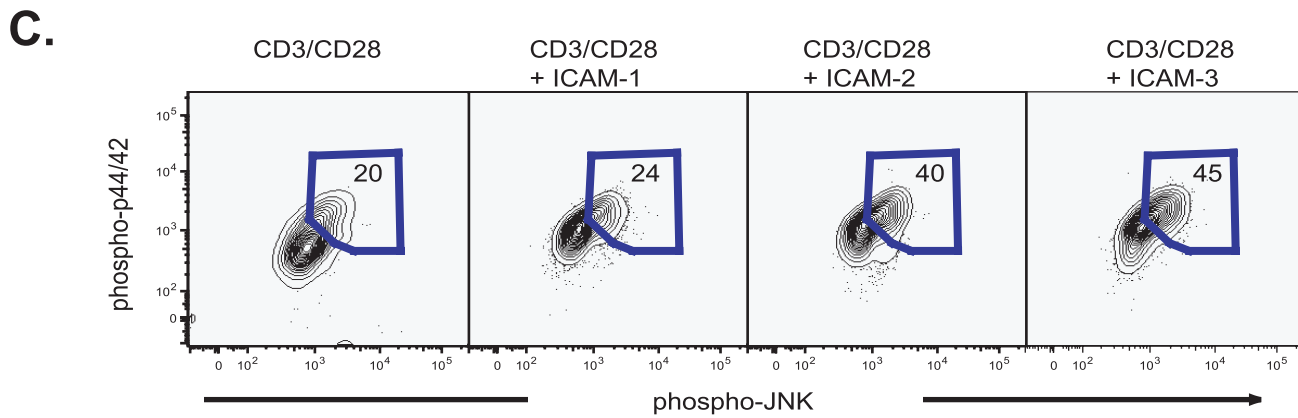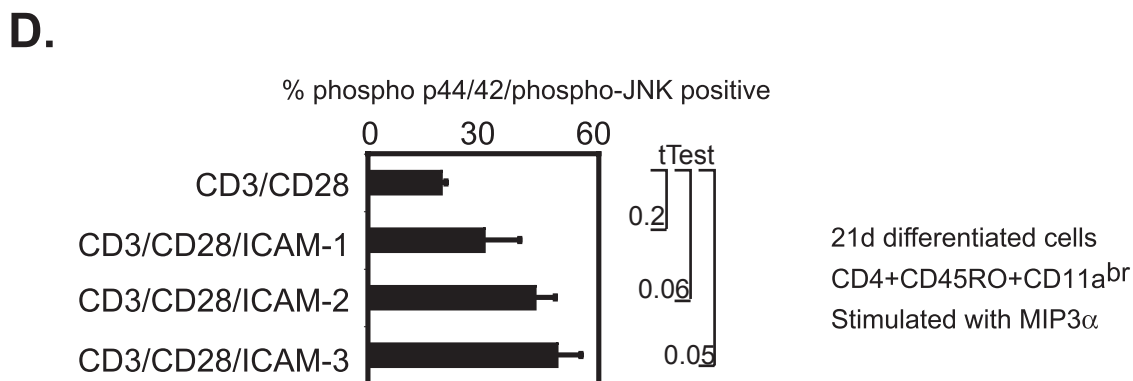

Supplement: MOESM7 [file 9428586]
